# Supplementary material for: Controllable assembly of Fe3O4–Fe3C@MC by in situ doping of Mn for CO2 selective hydrogenation to light olefins
Source: Royal Society of Chemistry journal article supplement (doi:10.1039/d2cy00173j), 2022-01-01
Supplement: d2cy00173j1.pdf [file d2cy00173j1.pdf]

**Controllable assembly of Fe<sub>3</sub>O<sub>4</sub>-Fe<sub>3</sub>C@MC by in-situ doping of Mn for CO<sub>2</sub>  
selective hydrogenation to light olefins**

Pengze Zhang, Jingyu Yan, Fei Han, Xianliang Qiao, Qingxin Guan\*, and Wei Li\*

*College of Chemistry, State Key Laboratory of Elemento-Organic Chemistry, Key  
Laboratory of Advanced Energy Materials Chemistry (Ministry of Education), Nankai  
University, No. 94 Weijin Road, Tianjin 300071, P. R. China.*

## **1. Materials**

Fe(NO<sub>3</sub>)<sub>3</sub>·9H<sub>2</sub>O (98%), Mn(NO<sub>3</sub>)<sub>2</sub>·6H<sub>2</sub>O (98%), and KNO<sub>3</sub> (99%) were purchased from Aladdin Ltd. (Shanghai, China). Zr(NO<sub>3</sub>)<sub>4</sub>·5H<sub>2</sub>O was purchased from Xiya Chemical Technology Co., Ltd. (NH<sub>4</sub>)<sub>10</sub>W<sub>12</sub>O<sub>41</sub>~xH<sub>2</sub>O was purchased from Sigma-Aldrich (Shanghai) Trading Co., Ltd. Phenol (98%) and ethanol (99%) were purchased from Shanghai Merrill Chemical Technology Co., Ltd. (Shanghai, China). Formaldehyde (37%) was purchased from Xiya Chemical Technology (Shandong) Co., Ltd. (Linyi, China). Polyether F127 (molecular weight = 13000) was purchased from Tianjin Solomon Biotechnology Co., Ltd. (Tianjin, China). Boric acid (98%) was purchased from Tianjin Bohua Chemical Reagent Co., Ltd. (Tianjin, China). Phenolic resin (M≈500) was synthesized according to the literature [1].

## **2. Catalyst characterization**

The structures of Fe-based catalysts were reported be changed during CO<sub>2</sub> hydrogenation reaction, so the catalysts of characterization were performed after the

catalytic performance evaluation.<sup>2,3</sup> The Fe content of the catalyst was analysed by X-ray fluorescence spectroscopy (Rigaku supermini 200), with boric acid as a binder. The analysis of the specific surface area and pore size distribution of the catalyst was performed on a Microtrac BEL BELsorp-Max. Powder X-ray diffraction (XRD) of the catalyst was performed on a Rigaku SmartLab 9 kW with a Cu K $\alpha$  radiation source. The catalysts were reduced in a H<sub>2</sub> atmosphere at 350 °C before being characterized. The morphology of the catalyst was characterized by high-resolution field emission transmission electron microscopy (HR-TEM) and high-angle annular dark field-scanning transmission electron microscopy (HAADF-STEM) on an FEI Talos F200x with Super X.

H<sub>2</sub> temperature-programmed reduction (H<sub>2</sub>-TPR), CO<sub>2</sub> temperature-programmed desorption (CO<sub>2</sub>-TPD), and H<sub>2</sub> temperature-programmed desorption (H<sub>2</sub>-TPD) were tested on a Micromeritics Autochem 2920. The H<sub>2</sub>-TPR and CO<sub>2</sub>-TPD tests were conducted after the sample was reduced at 350 °C with 50 mL/min 10% H<sub>2</sub>/Ar mixed gas for 1.0 h and then purged with Ar (50 mL/min) for 1.0 h. The H<sub>2</sub>-TPR test was conducted after the sample was heated at 350 °C with Ar (50 mL/min) for 1.0 h. The temperature program was increased from 50 to 800 °C at 10 °C/min. The chemical state of surface atoms was investigated by X-ray photoelectron spectroscopy (XPS) on a Thermo Scientific K-Alpha instrument equipped with an Al K $\alpha$  source. The binding energy was calibrated using adventitious carbon (C 1 s peak at 284.8 eV). The catalysts were reduced in a H<sub>2</sub> atmosphere at 350 °C before being characterized.

### **3. Catalytic activity evaluation**

The CO<sub>2</sub> hydrogenation reaction was performed in a fixed bed reactor (7.0 mm inner diameter), and the details of the reactor are given in Figure S1. Typically, 0.2 g catalyst (40–60 mesh) was used unless otherwise described. Before the activity evaluation, the catalyst was prereduced at H<sub>2</sub>: 25 mL/min, 350 °C for 1.0 h. Subsequently, N<sub>2</sub> (50 mL/min) was used to purge the reactor, and the temperature of the reactor changed to meet the reaction requirements. Hereafter, the mixed gas of H<sub>2</sub>, CO<sub>2</sub>, and Ar (CO<sub>2</sub>/H<sub>2</sub>/Ar = 24:72:4) was fed into the reactor, and the pressure increased to 3.0 MPa gradually. All reacted gas mixtures were detected by online gas chromatography (Fuli GC9790II). CO<sub>2</sub>, CO, CH<sub>4</sub>, and Ar were analysed on a TCD detector with Haysep C and TDX–01 packed columns, and hydrocarbons and carbon hydroxides were analysed on an FID detector with an RB-1 capillary column. The date of GC is shown in Figure S13. The hydrocarbon distribution was calculated based on the total carbon moles (C-mole%). The carbon balance of the products was calculated to be above 95%. The catalytic performance was analysed after 8.0 hours of the reaction.

CO<sub>2</sub> conversion was calculated using equation (1):

$$CO_2 \text{ Conversion (\%)} = \frac{CO_{2 \text{ in}} - CO_{2 \text{ out}}}{CO_{2 \text{ in}}} \times 100\% \quad (1)$$

where the CO<sub>2 in</sub> and CO<sub>2 out</sub> represented the volume of flow in and out of the reactor.

CO selectivity was calculated by equation (2):

$$CO \text{ Selectivity (\%)} = \frac{CO_{out}}{CO_{2 \text{ in}} - CO_{2 \text{ out}}} \times 100\% \quad (2)$$

where CO <sub>out</sub> represents the CO volume of flow out of the reactor.

The selectivity of hydrocarbons in the whole hydrocarbon was calculated according

to equation (3):

$$C_i \text{ hydrocarbon selectivity (C - mol\%)} = \frac{\text{Mole of } C_i \text{ hydrocarbon} \times i}{\sum_{i=1}^n \text{Mole of } C_i \text{ hydrocarbon} \times i} \times 100\%$$

(3)

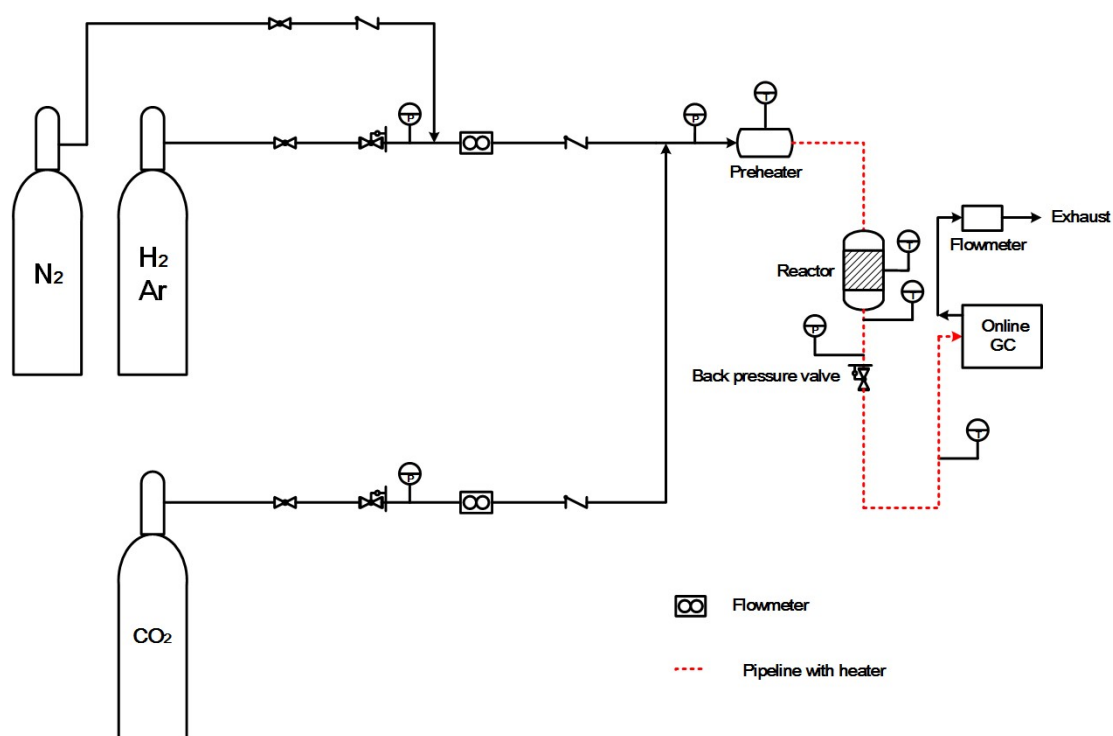

**Figure S1.** The schematic diagram of catalytic performance evaluation device.

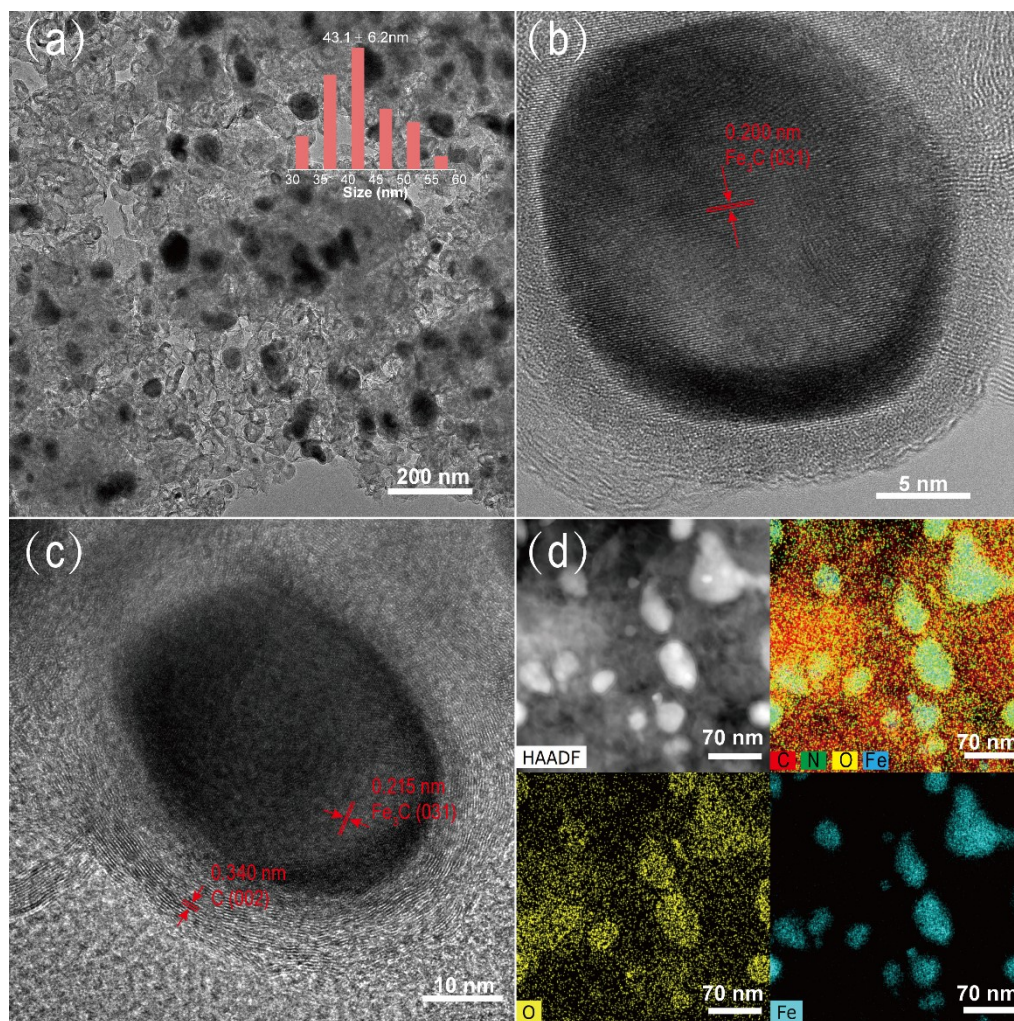

**Figure S2.** The HR-TEM images and HAADF-STEM images of 1.2Fe@MC.

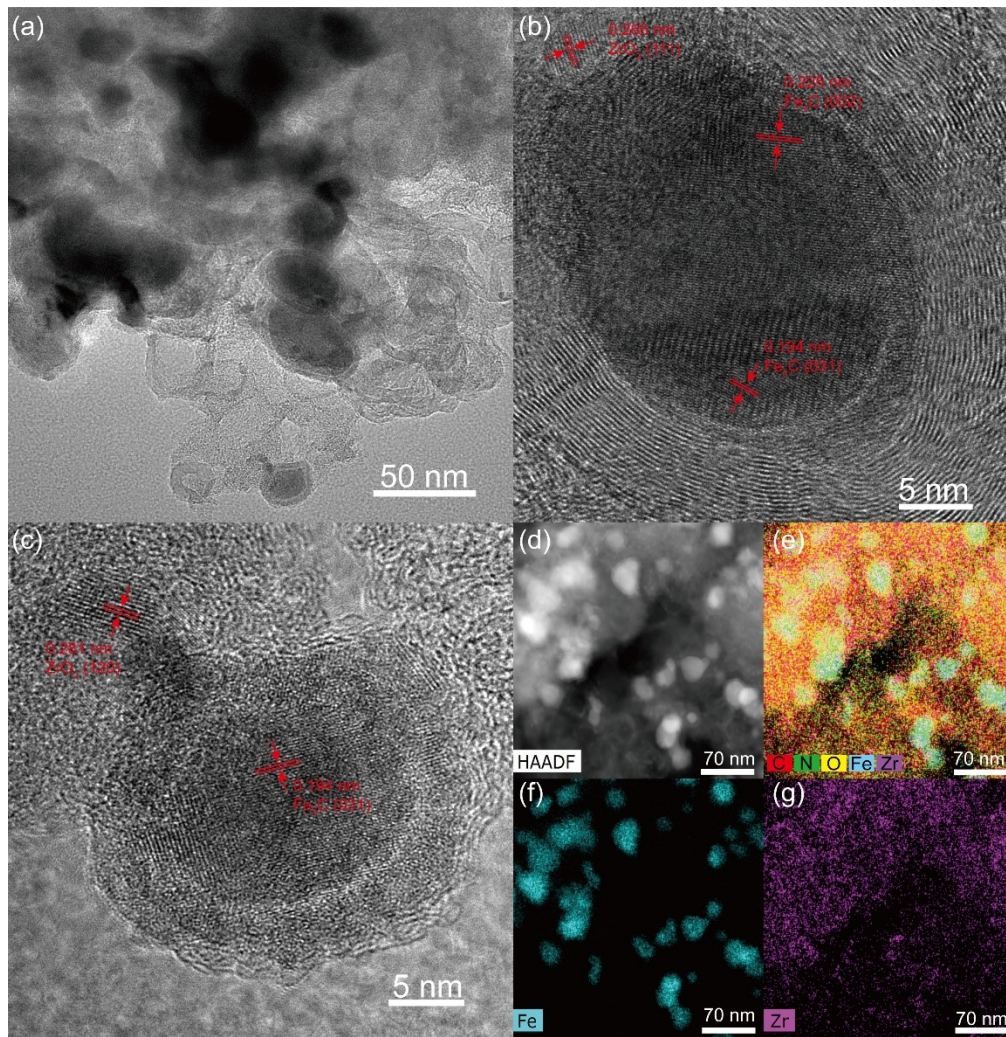

**Figure S3.** The HR-TEM images and HADDF-STEM images of 20%Zr-1.2Fe@MC.

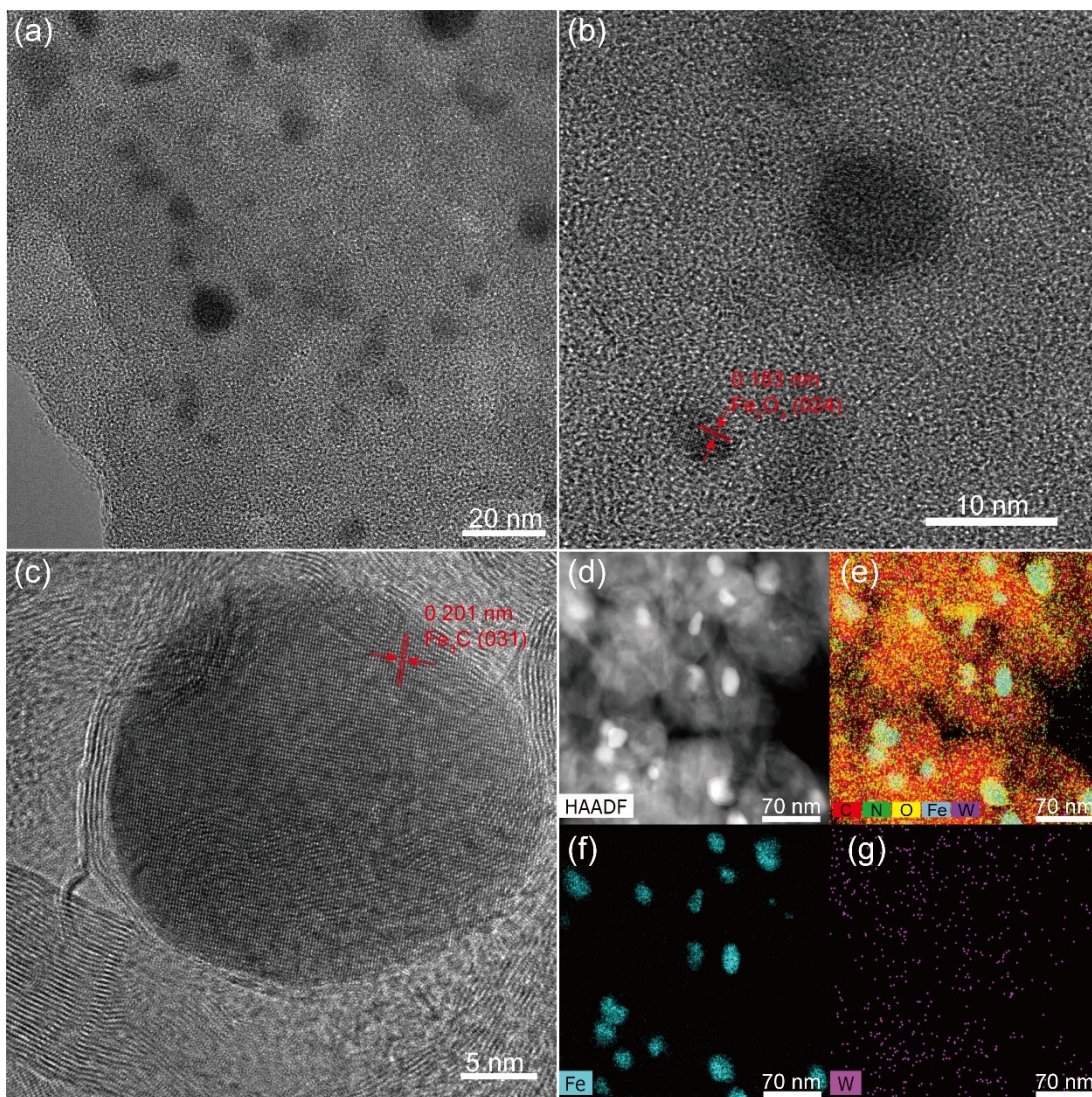

**Figure S4.** The HR-TEM images and HADDF-STEM images of 20%W-1.2Fe@MC.

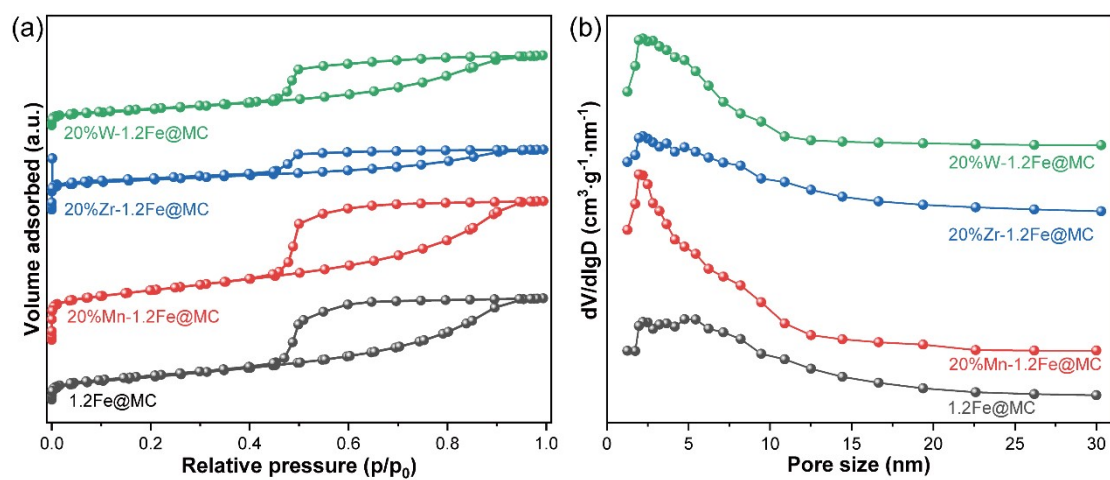

**Figure S5.** (a) The N<sub>2</sub>-adsorption and desorption curve of 1.2Fe@MC, 20%Mn-1.2Fe@MC, 20%Zr-1.2Fe@MC, and 20%W-1.2Fe@MC. (b) The Pore size of

1.2Fe@MC, 20%Mn-1.2Fe@MC, 20%Zr-1.2Fe@MC, and 20%W-1.2Fe@MC.

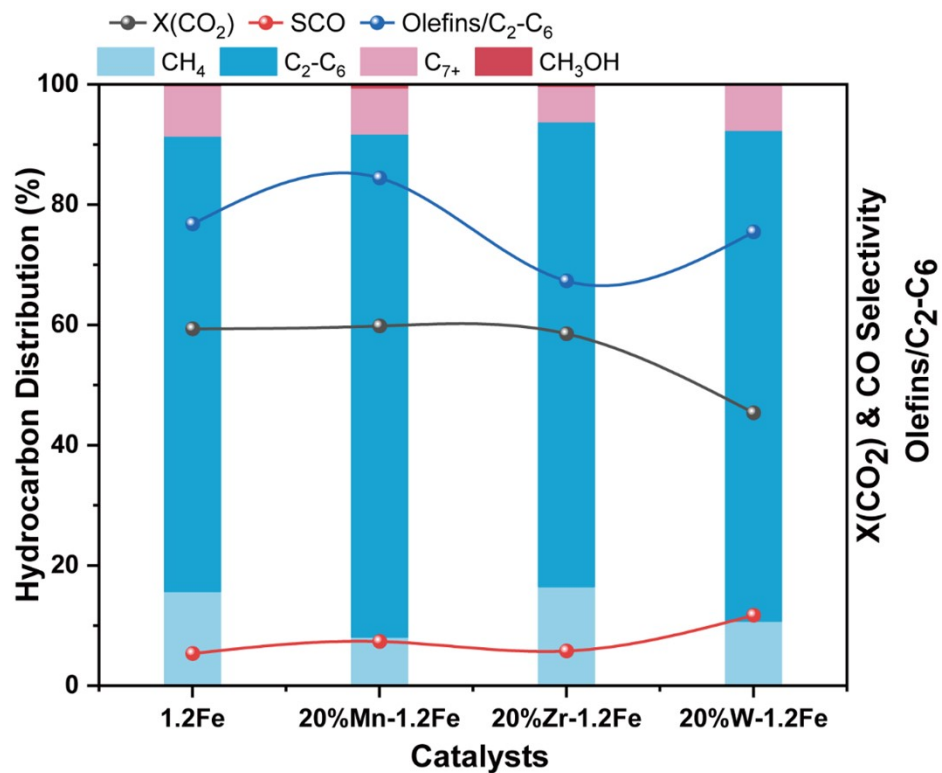

**Figure S6.** The catalytic performance of 1.2Fe@MC, 20%Mn-1.2Fe@MC, 20%Zr-1.2Fe@MC, and 20%W-1.2Fe@MC. Reaction conditions: 320 °C, 3.0MPa, GHSV = 12000 mL/g<sub>cat</sub>/h.



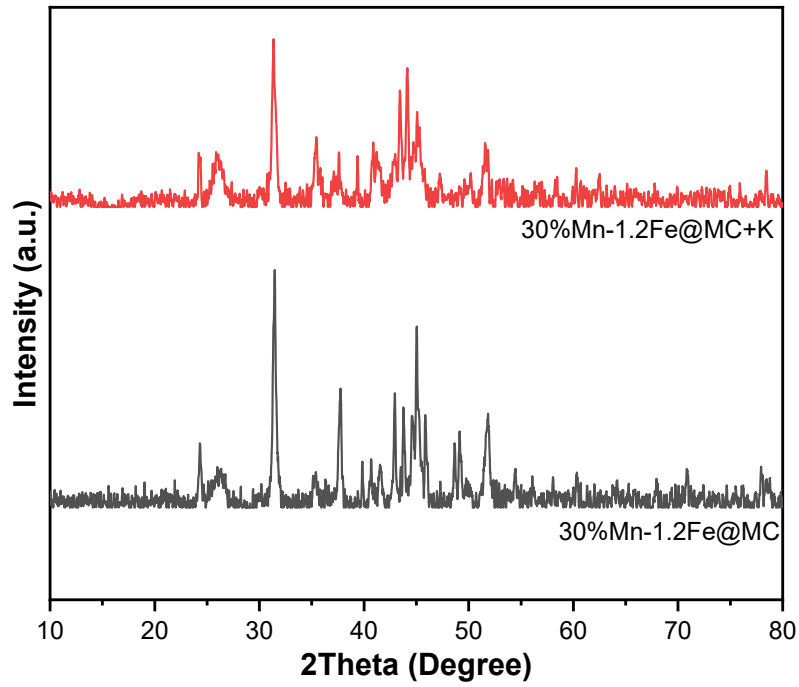

**Figure S7.** The XRD patterns of 30%Mn-1.2Fe@MC, 30%Mn-1.2Fe@MC+K.

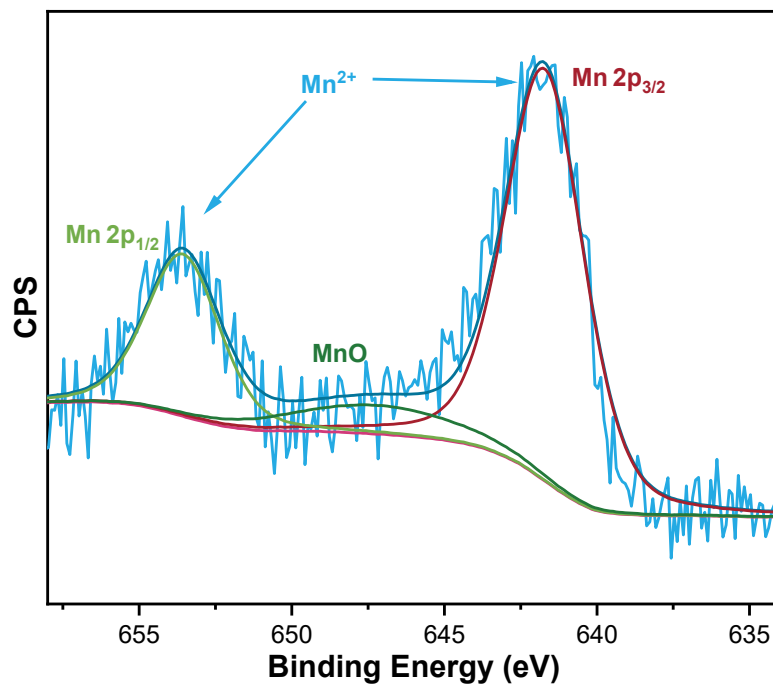

**Figure S8.** The Mn 2p XPS of 20%Mn-1.2Fe@MC

**Table S1.** The results of XPS peak fit

| Fe 2p <sub>3/2</sub> core |         |                       |                                                  |
|---------------------------|---------|-----------------------|--------------------------------------------------|
| Catalyst                  | BE (eV) | Concentration (atom%) | FeC <sub>x</sub> /Fe <sub>2</sub> O <sub>3</sub> |
| 1.2Fe@OMC                 | 707.2   | 8.0                   | 0.12                                             |
|                           | 708.3   | 2.7                   |                                                  |
|                           | 711.0   | 73.1                  |                                                  |
|                           | 713.0   | 16.1                  |                                                  |
| 20%Mn-1.2Fe               | 707.2   | 10.5                  | 0.18                                             |
|                           | 708.3   | 5.1                   |                                                  |
|                           | 711.0   | 67.5                  |                                                  |
|                           | 713.0   | 17.0                  |                                                  |
| 20%Zr-1.2Fe               | 707.1   | 5.1                   | 0.08                                             |
|                           | 708.1   | 2.5                   |                                                  |
|                           | 710.8   | 74.2                  |                                                  |
|                           | 713.0   | 18.2                  |                                                  |
| 20%W-1.2Fe                | 707.3   | 4.7                   | 0.07                                             |
|                           | 708.3   | 2.0                   |                                                  |
|                           | 710.6   | 64.6                  |                                                  |
|                           | 712.6   | 28.7                  |                                                  |
| 30%Mn-1.2Fe               | 707.2   | 5.0                   | 0.05                                             |
|                           | 708.3   | 0.0                   |                                                  |
|                           | 711     | 68.1                  |                                                  |

**Table S2.** The textural properties of catalysts

| Catalysts   | S <sub>BET</sub> (m <sup>2</sup> /g) | Mean pore diameter(nm) | Pore volume(cm <sup>3</sup> /g) |
|-------------|--------------------------------------|------------------------|---------------------------------|
| 1.2Fe       | 204.5                                | 5.3                    | 0.37                            |
| 20%Mn-1.2Fe | 270.3                                | 4.9                    | 0.33                            |
| 20%Zr-1.2Fe | 299.4                                | 3.39                   | 0.35                            |
| 20%W-1.2Fe  | 296.5                                | 6.9                    | 0.32                            |
| 10%Mn-1.2Fe | 305.6                                | 4.53                   | 0.35                            |
| 30%Mn-1.2Fe | 371.3                                | 2.9                    | 0.27                            |

**Table S3.** The result of element Analysis

| Catalyst | C     | O    | Fe    | Mn   | Zr   | W    |
|----------|-------|------|-------|------|------|------|
| 1.2Fe    | 92.23 | 7.24 | 15.44 | -    | -    | -    |
| 20%Mn    | 88.81 | 10.4 | 13.53 | 4.41 | -    | -    |
| 30%Mn    | -     | -    | 12.66 | 5.88 | -    | -    |
| 20%Zr    | 90.33 | 9.7  | 11.72 | -    | 6.02 | -    |
| 20%W     | 91.28 | 8.27 | 10.10 | -    | -    | 8.74 |

Fe, Mn, Zr, and W (wt.%) element analysis was determined by X-ray fluorescence spectroscopy.

The C and O (atom. %) element analysis was decided by X-ray photoelectron spectroscopy.

## Reference

- [1] Y. Meng, D. Gu, F. Zhang, Y. Shi, H. Yang; Li Z., C. Yu, B. Tu; D. Zhao, *Angew. Chem. Int. Ed.*, 2005, **44**, 7053.
- [2] E. de Smit, F. Cinquini, A. M. Beale, O. V. Safonova, W. van Beek, P. Sautet and B. M. Weckhuysen, *J. Am. Chem. Soc.*, 2010, **132**, 14928.
- [3] S. Li, J. Yang, C. Song, Q. Zhu, D. Xiao and D. Ma, *Adv. Mater.*, 2019, **31**, e1901796.
